# Supplementary material
Source: PubMed Central journal article supplement (PMC3553860)
Supplement: JCM.01170-12_zjm999092234so1.pdf [file JCM.01170-12_zjm999092234so1.pdf]

## **Supplemental material**

Supplemental file 1-Table S1 (Reference strains used in PCR-MS design)

Supplemental file 2-Table S2 (Primers used in PCR-MS)

Supplemental file 3-Table S3 (Comparison of multiple HPV genotypes obtained with PCR-MS and PCR)

Supplemental file 4-Figure.S1. Analysis of a dilution series of HPV18 plasmids using MassARRAY method. (A) 1000 copies / reaction, (B) 100 copies / reaction, (C) 50 copy / reaction, (D) 10 copy / reaction, (E) negative control. In the mass spectrometry mass spectra, the red dotted lines in the left and the blue dotted lines represent the unextended primers of HPV18 L1 and the extended primers of the assay, respectively.
