# Supplementary material
Source: PubMed Central journal article supplement (PMC3553860)

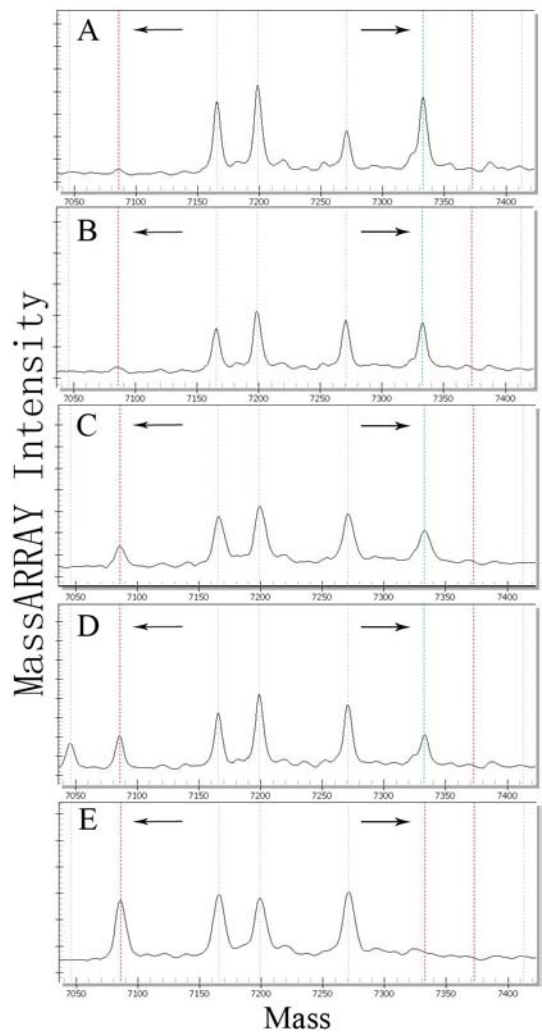

Supplement: JCM.01170-12_zjm999092234so5.pdf [file JCM.01170-12_zjm999092234so5.pdf]
